# Supplementary figures and images for: Evaluation of BD Vacutainer Eclipse and BD Vacutainer Ultra-Touch butterfly blood collecting sets in laboratory testing
Source: publisher site journal article supplement (doi:10.1515/tjb-2020-0626), 2021-08-23

**
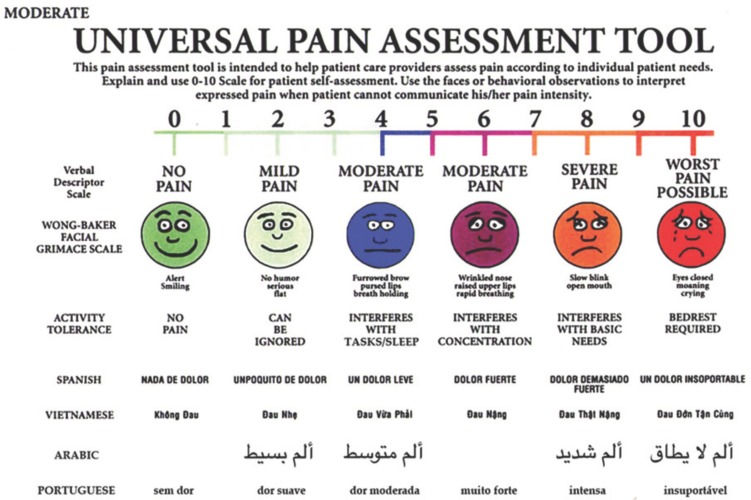
**

**Figure 1.** The Universal Pain Assessment Tool (UPAT).

Supplement: Supplementary file 1 [file j_tjb-2020-0626_suppl.docx]
